# Supplementary material for: Phytochemical Screening of Himatanthus sucuuba (Spruce) Woodson (Apocynaceae) Latex, In Vitro Cytotoxicity and Incision Wound Repair in Mice
Source: MDPI journal article supplement (doi:10.3390/plants10102197), 2021-10-16
Supplement: s1 [file s1]

## Supplementary materials

### Phytochemical Screening of *Himatanthus sucuuba* (Spruce) Woodson (Apocynaceae) latex, in-vitro cytotoxicity and incision wound repair in mice

Oscar Herrera-Calderón <sup>1</sup>, Lisbeth Lucia Calero-Armijos <sup>1</sup>, Wilson Cardona-G <sup>2</sup>, Angie Herrera-R <sup>2</sup>, Gustavo Moreno <sup>2</sup>, Majed A. Algarni <sup>3</sup>, Mohammed Alqarni <sup>4</sup>, Gaber El-Saber Batiha <sup>5</sup>

<sup>1</sup> Department of Pharmacology, Bromatology, Toxicology, Faculty of Pharmacy and Biochemistry, Universidad Nacional Mayor de San Marcos; oherreraca@unmsm.edu.pe (O.H-C); lisluc21@gmail.com (L.L.C-A.)

<sup>2</sup> Química de Plantas Colombianas, Faculty of Exact and Natural Sciences, Institute of Chemistry, University of Antioquia (UdeA), Calle 70 No. 52-21, Medellín AA 1226, Colombia, wilson.cardona1@udea.edu.co (W.C.-G), angie.herrerar@udea.edu.co (A.H-R.); gustavomorenoq@gmail.com (G.M)

<sup>3</sup> Department of Clinical Pharmacy, College of Pharmacy, Taif University, P.O. Box 11099, Taif 21944, Saudi Arabia; m.alqarni@tu.edu.sa (M.A.A.);

<sup>4</sup> Department of Pharmaceutical Chemistry, College of Pharmacy, Taif University, P.O. Box 11099, Taif 21944, Saudi Arabia; m.alqarni@tu.edu.sa (M.A.);

<sup>5</sup> Department of Pharmacology and Therapeutics, Faculty of Veterinary Medicine, Damanhour University, Damanhour, Egypt. dr\_gaber\_batiha@vetmed.dmu.edu.eg (M.A.).

\* Correspondence: oherreraca@unmsm.edu.pe; Tel.: (+51 956 550 510)

## Supplementary figures

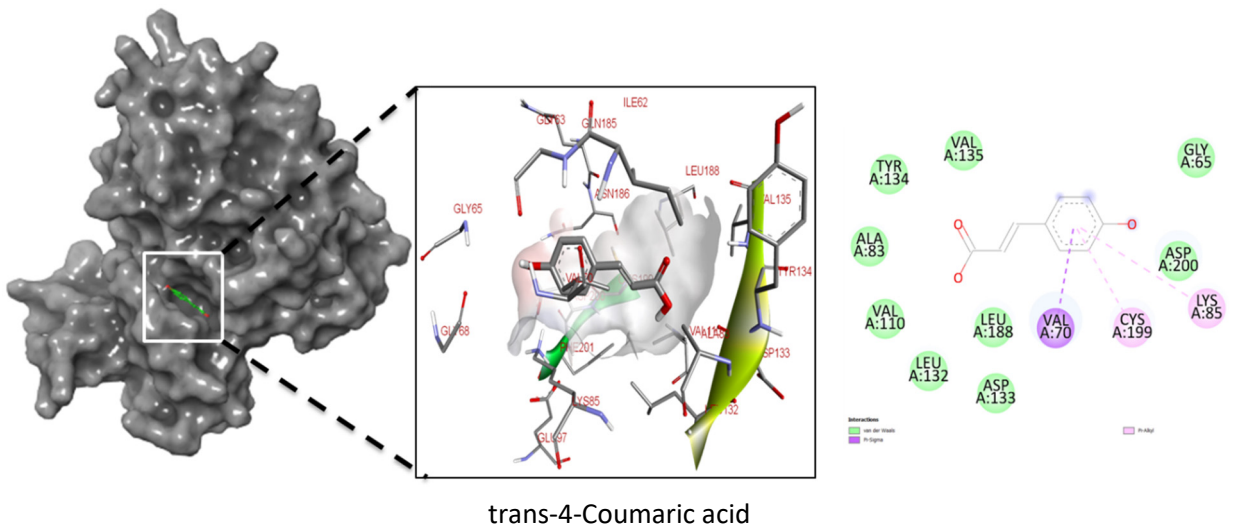

trans-4-Coumaric acid

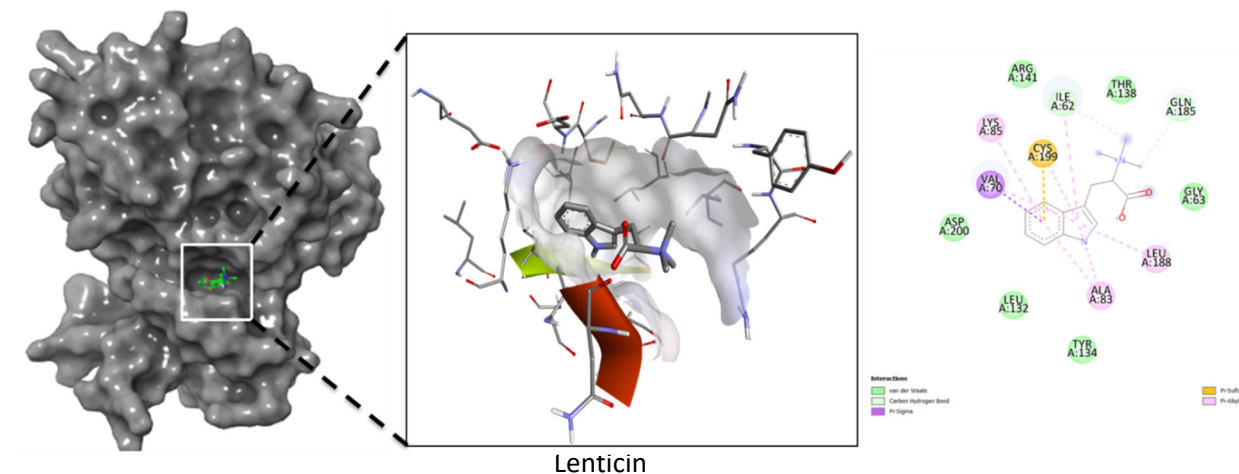

## Lenticin

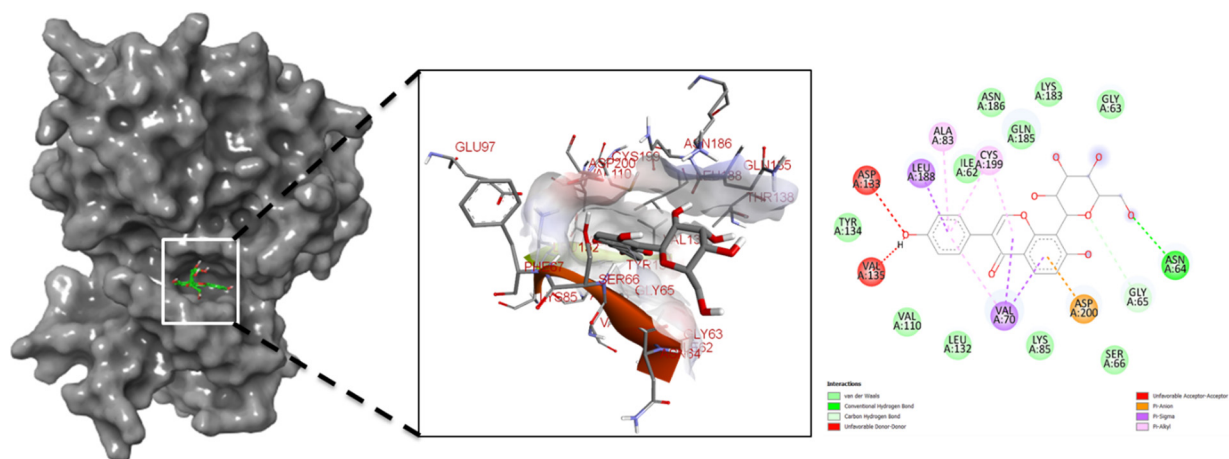

## Puerarin

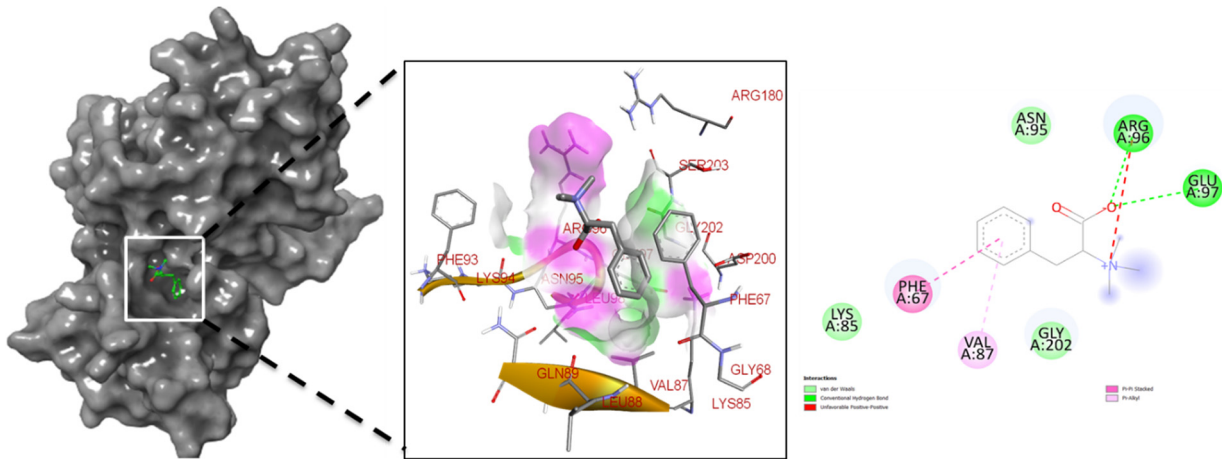

Phenylalanine betaine

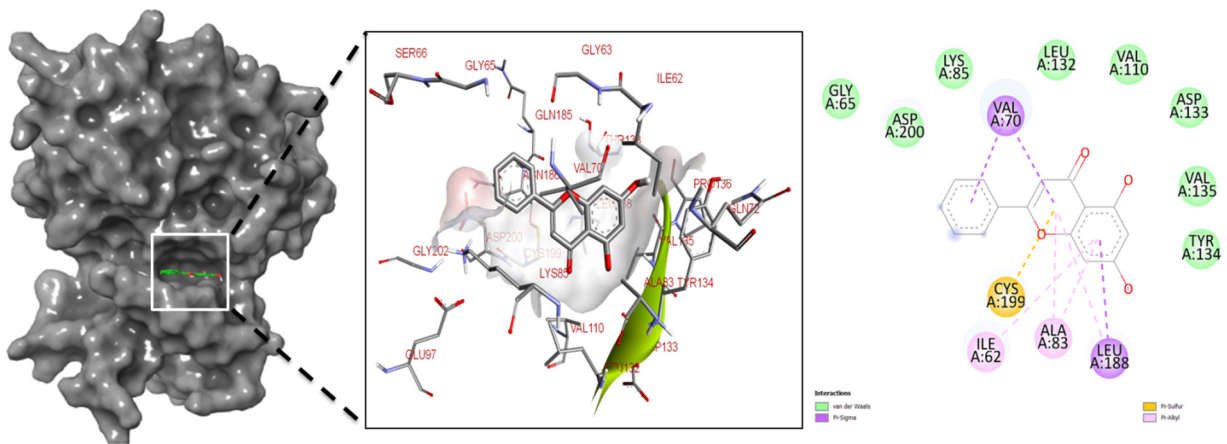

Chrysin

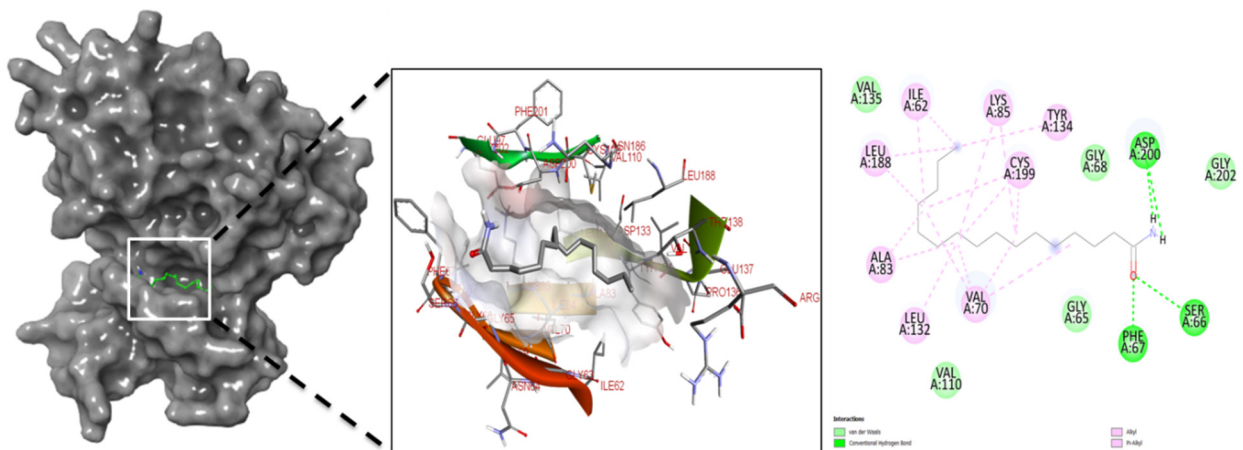

Palmitamide

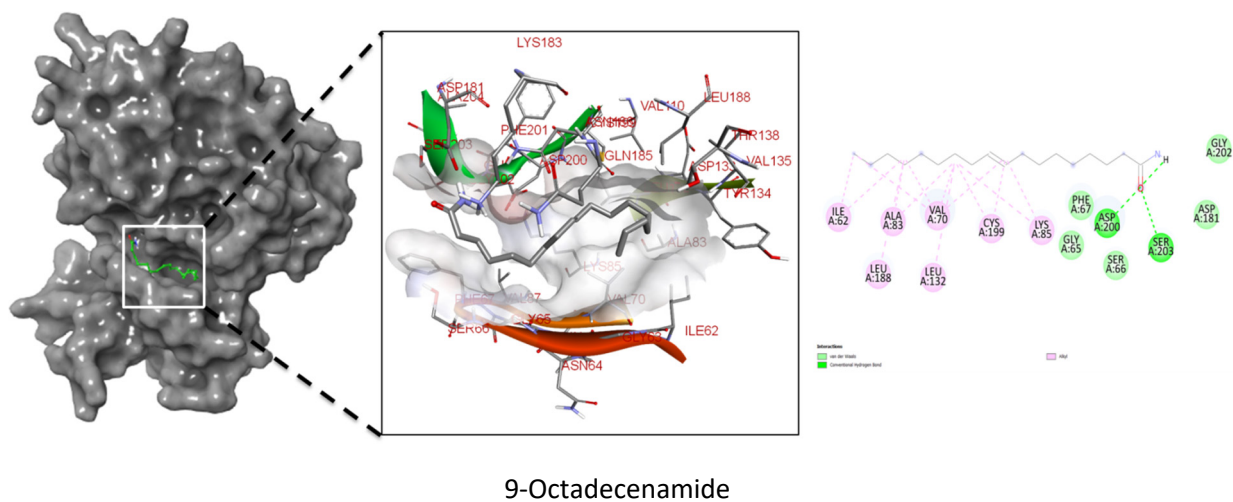

Figure S1. Molecular interactions studies of the phytochemical constituents of *H. sucuuba* latex with the Glycogen synthase kinase 3-β (PDB IDs: 1Q5K), surface view (Left panel) and 2D (Right panel) interactions.

**Table S1.** Representative images of SW480, SW620 and CHO-K1 cells 48 h after treatment with 1% DMSO (Magnification: 40x).

| UNTREATED CELLS                                                                                                                                                                                                                                                                                                                                                                                                          | CELLS WITH DMSO (1%)                                                                                                                                                                                                                                                                                                                             |
|--------------------------------------------------------------------------------------------------------------------------------------------------------------------------------------------------------------------------------------------------------------------------------------------------------------------------------------------------------------------------------------------------------------------------|--------------------------------------------------------------------------------------------------------------------------------------------------------------------------------------------------------------------------------------------------------------------------------------------------------------------------------------------------|
| <div>SW480</div> 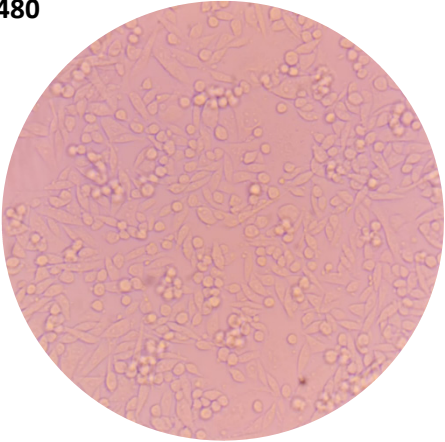 <p>A circular micrograph showing a dense monolayer of SW480 cells. The cells are epithelial in morphology, with many cells exhibiting rounded, polygonal shapes and some showing small, dark, rounded structures (possibly nuclei or vesicles) within the cytoplasm. The overall color is a light pinkish-purple.</p> | <div>SW480</div>  <p>A circular micrograph showing a dense monolayer of SW480 cells treated with 1% DMSO. The morphology is similar to the untreated cells, with a high density of cells and some rounded shapes. The color is a light pinkish-purple.</p>     |
| <div>SW620</div>  <p>A circular micrograph showing a dense monolayer of SW620 cells. The cells are epithelial, with many cells showing rounded shapes and some containing dark, rounded structures. The overall color is a light pinkish-purple.</p>                                                                                   | <div>SW620</div>  <p>A circular micrograph showing a dense monolayer of SW620 cells treated with 1% DMSO. The morphology is similar to the untreated cells, with a high density of cells and some rounded shapes. The color is a light pinkish-purple.</p>    |
| <div>CHO-K1</div>  <p>A circular micrograph showing a dense monolayer of CHO-K1 cells. The cells are epithelial, with many cells showing rounded shapes and some containing dark, rounded structures. The overall color is a light pinkish-purple.</p>                                                                                | <div>CHO-K1</div>  <p>A circular micrograph showing a dense monolayer of CHO-K1 cells treated with 1% DMSO. The morphology is similar to the untreated cells, with a high density of cells and some rounded shapes. The color is a light pinkish-purple.</p> |
